# Supplementary material
Source: publisher figshare collection journal article supplement (https://acs.figshare.com/ndownloader/files/24501154)
Supplement: Supplementary file 1 [file 24501154]

## Supporting Information

# Electronically Excited OH Super Rotors from Water Photodissociation by Using Vacuum Ultraviolet Free-Electron Laser Pulses

Yao Chang<sup>1#</sup>, Feng An<sup>2#</sup>, Qinming Li<sup>1,5#</sup>, Zijie Luo<sup>1,3</sup>, Li Che<sup>3</sup>, Jiayue Yang<sup>1</sup>, Zhichao Chen<sup>1</sup>, Weiqing Zhang<sup>1</sup>, Guorong Wu<sup>1</sup>, Xixi Hu<sup>2\*</sup>, Daiqian Xie<sup>2</sup>, Kaijun Yuan<sup>1,5\*</sup>, Xueming Yang<sup>1,4</sup>

1. *State key Laboratory of Molecular Reaction Dynamics, Dalian Institute of Chemical Physics, Chinese Academy of Sciences, 457 Zhongshan Road, Dalian, 116023, China*
2. *Key Laboratory of Mesoscopic Chemistry, School of Chemistry and Chemical Engineering, Institute of Theoretical and Computational Chemistry, Nanjing University, Nanjing 210093, China*
3. *Department of Physics, School of Science, Dalian Maritime University, 1 Linghai Road, Dalian, Liaoning 116026, P. R. China*
4. *Department of Chemistry, Southern University of Science and Technology, Shenzhen 518055, China*
5. *University of Chinese Academy of Sciences, Beijing 100049, P. R. China*

## 1. Dissociation Channels at 96.4 nm Photolysis

The initial excitation of H<sub>2</sub>O at 96.4 nm in this work is to a high-lying Rydberg state. Since the first ionization potential of H<sub>2</sub>O is 12.6 eV (98.2 nm), the vertical excitation energy of this Rydberg state has already above the ionization limit. With the references, the ionization quantum yield of H<sub>2</sub>O at this wavelength is  $\sim 0.3^{1,2}$ , which means about 70% of H<sub>2</sub>O molecules still remain neutral (which is called super excited states). The photofragmentation of such super excited molecules is important in the upper ionosphere of the planets and in the photodissociation region of the planetary nebula. Possible dissociation channels for H<sub>2</sub>O following excitation at 96.4 nm are listed below, along with the corresponding thermo-chemical threshold energy<sup>3</sup>

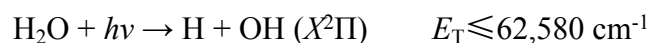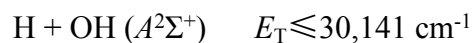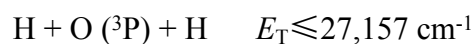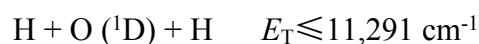

The total translational energy ( $E_T$ ) spectra have been recorded previously with the wavelength between 121-132 nm<sup>4,5</sup>. Comparing with those results, the sharp structures were dominant, and the broad component underlying those structures was only observed at the excitation energies above the threshold of triple dissociation channel O (<sup>3</sup>P) + 2H, which suggests the broad component arises from the triple dissociation channel, and the extensive sharp structures are attributed to the rovibrational states of OH(A/X) fragments. This assumption can help us to fit the dissociation channels shown in Figure S1.

According to the above assumption, the broad structureless components are assigned to the triple dissociation channels, and the sharp structures are attributed to the binary dissociation channels. Then we use a Gaussian profile to simulate the population of each quantum state. The width of the profile for each quantum state used in the simulation varies according to the relative kinetic energy resolution ( $\delta E/E < 1\%$ ) and the FEL beam width. The intensities of each OH quantum state and of the broad feature (attributable to the triple fragmentation products) are adjusted to produce a summed simulated  $E_T$  spectrum that should match the experimental data. Recognizing that two H atoms are formed in the triple dissociation process, a branching ratio for the triple dissociation channels and the binary dissociation channels is  $\sim 0.8:0.2$ . We note that the branching fraction into the triple dissociation channels are least well determined, as this process has not been fully characterized in the experiment (The fitting error bar for the triple dissociation channel is estimated to be  $\pm 10\%$ ). With the references, the absorption cross-section of  $H_2O$  at 96.4 nm is  $\sigma_{H_2O} \sim 1.7 \times 10^{-17} \text{ cm}^2$ , and the ionization fraction of  $H_2O$  at this wavelength is  $\sim 0.3$ . Thus the cross section for  $H+OH(X/A)$  product formation following 96.4 nm photodissociation of  $H_2O$  can be estimated to be  $1.7 \times 10^{-17} \times (1-0.3) \times 0.2 \sim 2.4 (\pm 1.0) \times 10^{-18} \text{ cm}^2$ . About 30% of the OH products formed at this wavelength are in rotational levels with energies above the OH(A) dissociation limit, suggesting that the cross section for forming OH(A) “super rotors” in the 96.4 nm photolysis of  $H_2O$  at is  $\sim (0.7 \pm 0.3) \times 10^{-18} \text{ cm}^2$ .

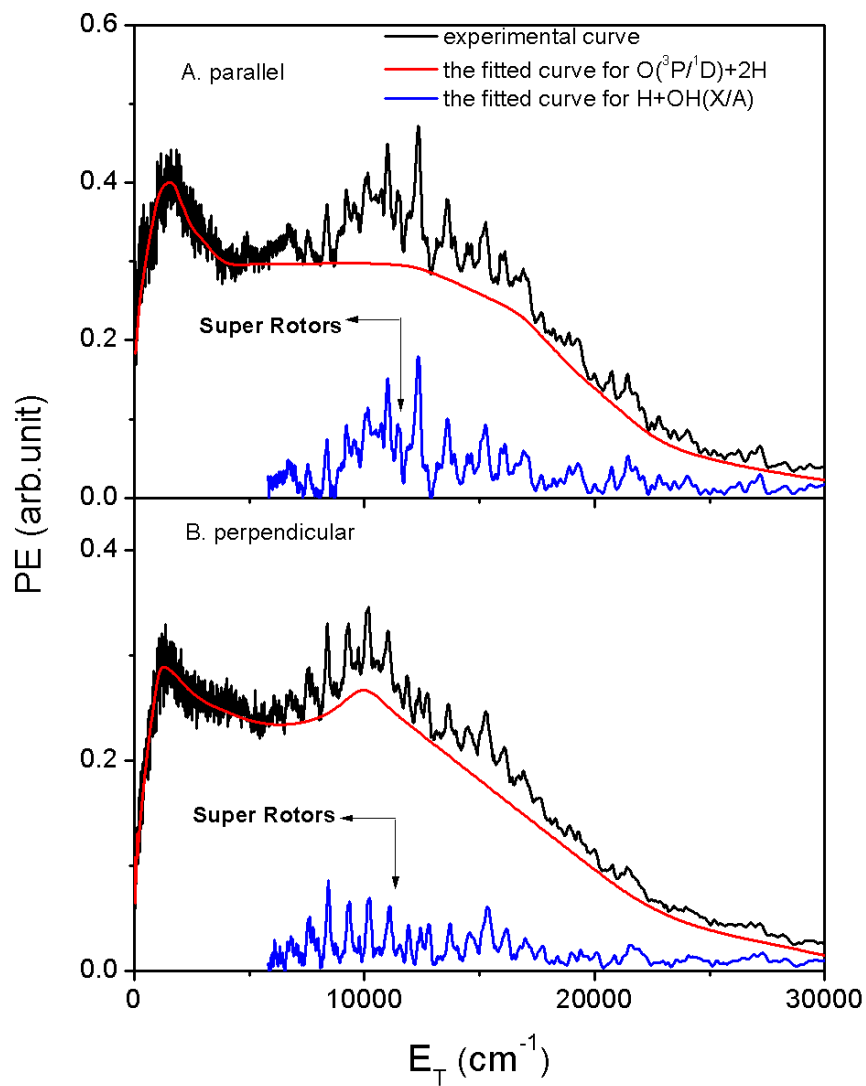

Figure S1 Deconvolutions of the  $E_T$  spectra derived from the H atom TOF spectra measured following 96.4 nm photolysis of  $\text{H}_2\text{O}$  into components associated with  $\text{O}(^3\text{P}/^1\text{D})+2\text{H}$  and  $\text{H}+\text{OH}(\text{X/A})$  fragments.

Table S1 The  $E_T$  (OH ( $A$ ,  $v'=0$  and  $1, j$ )) values for assignment shown in Figure 2.

|    | $E_T$ (OH ( $A$ , $v'=0, j$ ))<br>$=hv-D_0(\text{H-OH})-T_{v'=0,j} / \text{cm}^{-1}$ | $E_T$ (OH ( $A$ , $v'=1, j$ ))<br>$=hv-D_0(\text{H-OH})-T_{v'=1,j} / \text{cm}^{-1}$ |
|----|--------------------------------------------------------------------------------------|--------------------------------------------------------------------------------------|
| 0  | 30141                                                                                | 27154                                                                                |
| 1  | 30107                                                                                | 27122                                                                                |
| 2  | 30039                                                                                | 27057                                                                                |
| 3  | 29937                                                                                | 26961                                                                                |
| 4  | 29802                                                                                | 26832                                                                                |
| 5  | 29633                                                                                | 26672                                                                                |
| 6  | 29431                                                                                | 26480                                                                                |
| 7  | 29196                                                                                | 26257                                                                                |
| 8  | 28929                                                                                | 26003                                                                                |
| 9  | 28630                                                                                | 25718                                                                                |
| 10 | 28298                                                                                | 25404                                                                                |
| 11 | 27936                                                                                | 25060                                                                                |
| 12 | 27543                                                                                | 24686                                                                                |
| 13 | 27120                                                                                | 24285                                                                                |
| 14 | 26667                                                                                | 23855                                                                                |
| 15 | 26185                                                                                | 23398                                                                                |
| 16 | 25675                                                                                | 22915                                                                                |
| 17 | 25138                                                                                | 22406                                                                                |
| 18 | 24574                                                                                | 21872                                                                                |
| 19 | 23984                                                                                | 21314                                                                                |
| 20 | 23369                                                                                | 20732                                                                                |
| 21 | 22730                                                                                | 20129                                                                                |
| 22 | 22068                                                                                | 19504                                                                                |
| 23 | 21384                                                                                | 18858                                                                                |
| 24 | 20679                                                                                | 18194                                                                                |
| 25 | 19954                                                                                | 17511                                                                                |
| 26 | 19210                                                                                | 16812                                                                                |
| 27 | 18449                                                                                | 16097                                                                                |
| 28 | 17671                                                                                | 15367                                                                                |
| 29 | 16878                                                                                | 14624                                                                                |
| 30 | 16071                                                                                | 13869                                                                                |
| 31 | 15252                                                                                | 13104                                                                                |
| 32 | 14421                                                                                | 12330                                                                                |
| 33 | 13581                                                                                | 11549                                                                                |
| 34 | 12733                                                                                | 10761                                                                                |
| 35 | 11878                                                                                | 9969                                                                                 |
| 36 | 11019                                                                                | 9174                                                                                 |
| 37 | 10155                                                                                | 8379                                                                                 |
| 38 | 9290                                                                                 | 7583                                                                                 |

|    |      |      |
|----|------|------|
| 39 | 8425 | 6791 |
| 40 | 7562 | 6002 |
| 41 | 6702 | 5219 |
| 42 | 5848 | 4445 |
| 43 | 5003 |      |

\*The Term values of  $T_{v,j}$  with  $j < 33$  are adapted from Ref. 34 in the main text, and the levels with  $j \geq 33$  are obtained by polynomial fitting. In a jet-cooled molecular beam, the rotational temperature of parent  $\text{H}_2\text{O}$  is quite cold, giving the  $E_{\text{int}}(\text{H}_2\text{O}) \approx 0$ .

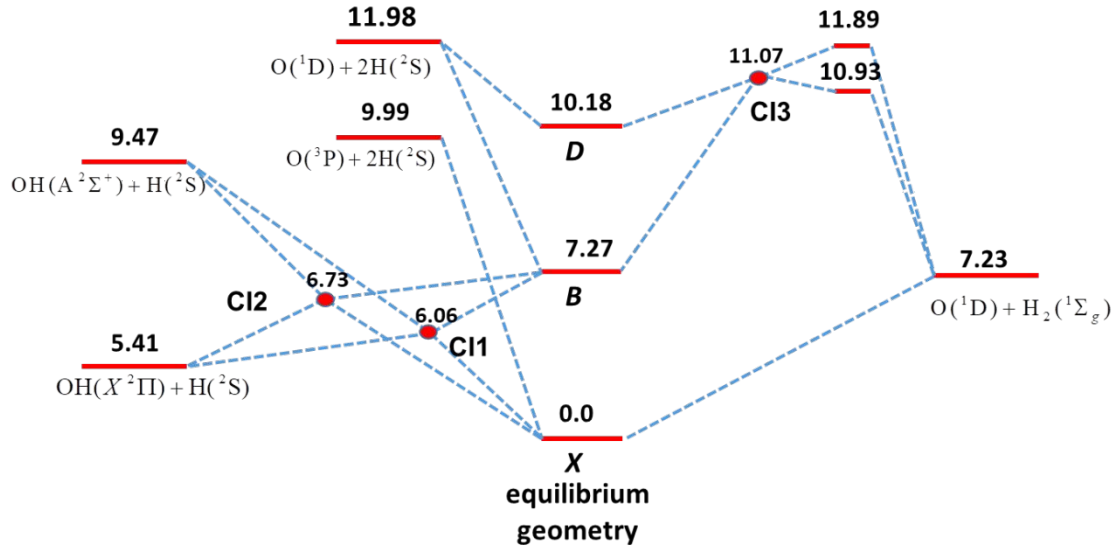

Figure S2. Energy level diagram for the binary and three-body dissociation of  $\text{H}_2\text{O}$ . The numbers are energies including zero-point energy with respect to the ground state energy (The unit is eV). There are two conical intersections (CIs) between the  $\tilde{B}$  and  $\tilde{X}$  states, which arise because for a linear approach of H to OH a repulsive potential curve from  $\text{H}+\text{OH}(\text{X})$  can cross an attractive potential curve from  $\text{H}+\text{OH}(\text{A})$ , whereas there is an avoided crossing of these curves in the lower symmetry of a bent geometry.

## 2. Computational Details

The adiabatic potential energy curves (PECs) of the ground and six low-lying excited states of the OH radical have been calculated using the multi-reference configuration interaction (MRCI) method with the large basis set of aug-cc-pV5Z. The OH radical total 9 electrons that occupied in 6 orbitals while 1s orbital of the atom O is doubly occupied and not optimized in all configuration. The active space used here is [3110] for  $[a_1b_1b_2a_2]$  using  $C_{2v}$  symmetry. The spin-orbit (SO) coupling matrix elements are considered in this work and computed by using the Breit–Pauli Hamiltonian at the same level. The PECs were constructed with the cubic spline interpolation method.

The dissociation energy, excitation energy and equilibrium bond length are in good agreement with the experimental values, as shown in Table S2. The SO Hamiltonian in the six-state diabatic basis is shown in Table S3.

Table S2. The dissociation energy, excitation energy and equilibrium bond length for the two electronic states.

|               |           | $D_e / \text{cm}^{-1}$ | $T_e / \text{cm}^{-1}$ | $r_e / \text{bohr}$ |
|---------------|-----------|------------------------|------------------------|---------------------|
| $X^2\Pi$      | This work | 37231.9                | -                      | 1.8289              |
|               | Expt.     | 37290                  | -                      | 1.8325              |
| $A^2\Sigma^+$ | This work | 20490.5                | 32573                  | 1.9086              |
|               | Expt.     | 20476                  | 32684.1                | 1.9126              |

Table S3. The SO Hamiltonian in the six-state diabatic basis.

| $\hat{H}_{so}$                                       | $ X^2\Pi_+\rangle\left -\frac{1}{2}\right\rangle$ | $ ^4\Pi_+\rangle\left -\frac{1}{2}\right\rangle$ | $ ^4\Pi_-\rangle\left +\frac{3}{2}\right\rangle$ | $ A^2\Sigma^+\rangle\left +\frac{1}{2}\right\rangle$ | $ ^2\Sigma^-\rangle\left +\frac{1}{2}\right\rangle$ | $ ^4\Sigma^-\rangle\left +\frac{1}{2}\right\rangle$ |
|------------------------------------------------------|---------------------------------------------------|--------------------------------------------------|--------------------------------------------------|------------------------------------------------------|-----------------------------------------------------|-----------------------------------------------------|
| $ X^2\Pi_+\rangle\left -\frac{1}{2}\right\rangle$    | A1                                                | B1                                               | 0                                                | B2                                                   | B3                                                  | B4                                                  |
| $ ^4\Pi_+\rangle\left -\frac{1}{2}\right\rangle$     | B1                                                | A2                                               | 0                                                | B5                                                   | B6                                                  | B7                                                  |
| $ ^4\Pi_-\rangle\left +\frac{3}{2}\right\rangle$     | 0                                                 | 0                                                | A3                                               | B8                                                   | B9                                                  | B10                                                 |
| $ A^2\Sigma^+\rangle\left +\frac{1}{2}\right\rangle$ | B2                                                | B5                                               | B8                                               | 0                                                    | B11                                                 | B12                                                 |
| $ ^2\Sigma^-\rangle\left +\frac{1}{2}\right\rangle$  | B3                                                | B6                                               | B9                                               | B11                                                  | 0                                                   | 0                                                   |
| $ ^4\Sigma^-\rangle\left +\frac{1}{2}\right\rangle$  | B4                                                | B7                                               | B10                                              | B12                                                  | 0                                                   | 0                                                   |

References:

- (1) Lee, L. C.; Suto, M. quantitative photoabsorption and fluorescence study of H<sub>2</sub>O and D<sub>2</sub>O at 50-190nm. *Chem. Phys.* **1986**, *110*, 161-169.
- (2) Fillion, J. H.; Dulieu, F.; Baouche, S.; Lemaire, J. L.; Jochims, H. W.; Leach, S. Ionization yield and absorption spectra reveal superexcited Rydberg state relaxation processes in H<sub>2</sub>O and D<sub>2</sub>O. *J. Phys. B: At., Mol. Opt. Phys.* **2003**, *36*, 2767-2776.
- (3) Harich, S. A.; Hwang, D. W. H.; Yang, X.; Lin, J. J.; Yang, X.; Dixon, R. N. Photodissociation of H<sub>2</sub>O at 121.6 nm: A state-to-state dynamical picture. *J. Chem. Phys.* **2000**, *113*, 10073-10090.
- (4) K. J. Yuan; R. N. Dixon; Yang, X. M. Photochemistry of the Water Molecule: Adiabatic versus Nonadiabatic Dynamics. *Acc. Chem. Res.* **2011**, *44*, 369-378.
- (5) K. Yuan; Y. Cheng; L. Cheng; Q. Guo; D. Dai; X. Wang; X. Yang; Dixon, R. N. Nonadiabatic dissociation dynamics in H<sub>2</sub>O: Competition between rotationally and nonrotationally mediated pathways. *Proc. Natl. Acad. Sci. U S A* **2008**, *105* 19148–19153.
